# Supplementary material for: Atomic-scale visualization of single atom formation in metal–organic frameworks
Source: Royal Society of Chemistry journal article supplement (doi:10.1039/d4ta07390h), 2025-01-01
Supplement: d4ta07390h2.pdf [file d4ta07390h2.pdf]

## Supporting Information

### Atomic-Scale Visualization of Single Atom Formation in Metal-Organic Frameworks

Kai-Yuan Hsiao,<sup>a</sup> Yi-Dong Lin,<sup>a</sup> Yu-Ru Lin,<sup>a</sup> Ching-Wei Chin,<sup>d</sup> Chun-Hui Lin,<sup>a</sup> Ruei-Hong Cyu,<sup>a</sup> Yan-Gu Lin,<sup>bc</sup> Yu-Lun Chueh,<sup>adef</sup> and Ming-Yen Lu<sup>\*ad</sup>

<sup>a</sup>Department of Materials Science and Engineering, National Tsing Hua University, Hsinchu 300, Taiwan

<sup>b</sup>Scientific Research Division, National Synchrotron Radiation Research Center, Hsinchu 300092, Taiwan

<sup>c</sup>Department of Materials Science and Engineering, National Yang-Ming Chiao Tung University, Hsinchu 300093, Taiwan

<sup>d</sup>College of Semiconductor Research, National Tsing Hua University, Hsinchu 30013, Taiwan

<sup>e</sup>Department of Physics, National Sun Yat-Sen University, Kaohsiung 80424, Taiwan

<sup>f</sup>Department of Materials Science and Engineering, Korea University, Seoul 02841, Republic of Korea

\*E-mail: [mylu@mx.nthu.edu.tw](mailto:mylu@mx.nthu.edu.tw)

## **Experimental Section**

### **Synthesis of Fe-ZIF**

Zn(NO<sub>3</sub>)<sub>2</sub> (0.5904 g) and 2-methylimidazole (2-mIM, 1.3020 g) were dissolved individually in MeOH (20 mL) under sonication. Then, Fe(acac)<sub>3</sub> (0.07 g) were added to Zn(NO<sub>3</sub>)<sub>2</sub> solution under sonication. The solutions of 2-mIM and Zn(NO<sub>3</sub>)<sub>2</sub> solution were mixed and stirred for 5 min, followed by placing at room temperature (RT) for 12 h. The resulting precipitation was collected, washed with MeOH (at least three times), and dried at 80 °C for 12 h.

### **Synthesis of Fe-400, Fe-900, and Fe-1100**

The ZIF-8 powders were placed in Al<sub>2</sub>O<sub>3</sub> crucibles, loaded into a tube furnace, heated to 400 °C, 900 °C and 1100 °C (at 5 °C/min) under an Ar flow and held for 3 h, for Fe-400, Fe-900, and Fe-1100, respectively. Then, the furnace was cooled to RT naturally.

### **Material Characterization**

The morphologies, compositions, and phases of the materials were investigated using scanning electron microscopy (SEM, Hitachi SU8010), X-ray diffractometry (XRD, Bruker D2 phaser) with Cu K $\alpha$  radiation, and high-resolution X-ray photoelectron spectrometry (HR-XPS, ULVAC-PHI PHI 5000 Versaprobe II). TEM and scanning

TEM (STEM) images were recorded using a spherical-aberration-corrected field-emission transmission electron microscope (Cs-corrected TEM, JEOL ARM-200FTH) at an accelerating voltage of 200 kV. Elemental distributions were measured using equipped energy dispersive spectrometry (EDS).

### **In situ STEM observation**

In situ STEM observation was performed using the JEOL ARM-200FTH microscope operated at 200 kV. The Fe-ZIF particles were dispersed in EtOH. A drop of the resulting solution was placed on a dedicated E-chip and dried at 60 °C. The E-chip was assembled in an in situ heating holder (Fusion, Protochips). To minimize the effect of electron beam irradiation, the current density was maintained below 16 pA/cm<sup>2</sup>.

### **Computational method**

The density functional theory (DFT) calculations were utilized the Vienna ab initio simulation package (VASP) with plane-wave basis sets and the projector augmented-wave (PAW) method.<sup>1-4</sup> The exchange-correlation potential followed the generalized gradient approximation (GGA) using the Perdew-Burke-Ernzerhof (PBE) parametrization,<sup>5</sup> supplemented by Grimme's DFT-D3 model for van der Waals corrections.<sup>6</sup> A cutoff energy of 520 eV and a  $\Gamma$ -centered Monkhorst-Pack mesh of  $2 \times 2 \times 1$  were employed for Brillouin-zone integration.<sup>7</sup> In cases involving strongly correlated Fe atoms, a spin-polarized DFT+U correction with  $U = 5.3$  eV was applied. Structural relaxation continued until forces on each atom were less than 0.01 eV/Å, achieving an energy convergence threshold of  $10^{-5}$  eV. Optimization ensured structures reached their minimum energy states. To ascertain optimized diffusion paths of

[Fe(acac)]<sup>2+</sup> molecules (with one and three) on surfaces, the climbing-image nudged elastic band (CI-NEB) method utilized seven images per calculation.<sup>8</sup>

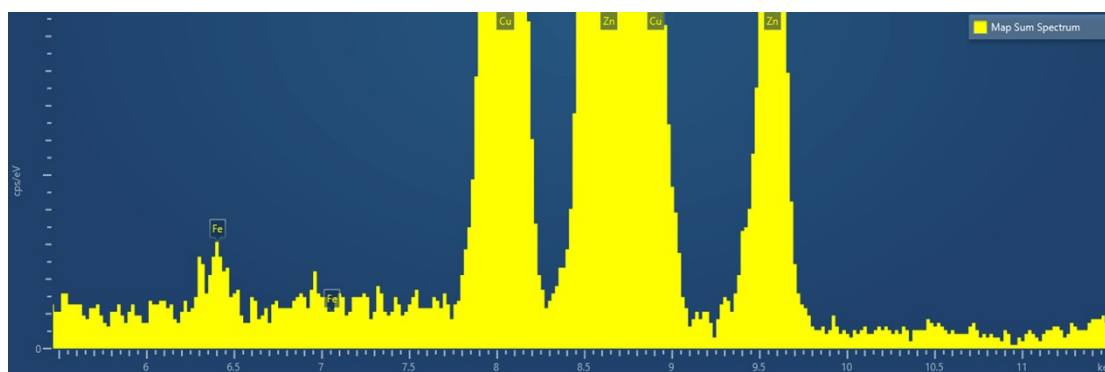

**Figure S1.** EDS spectrum of Fe-ZIF confirms the successful encapsulation of Fe species within the ZIF framework.

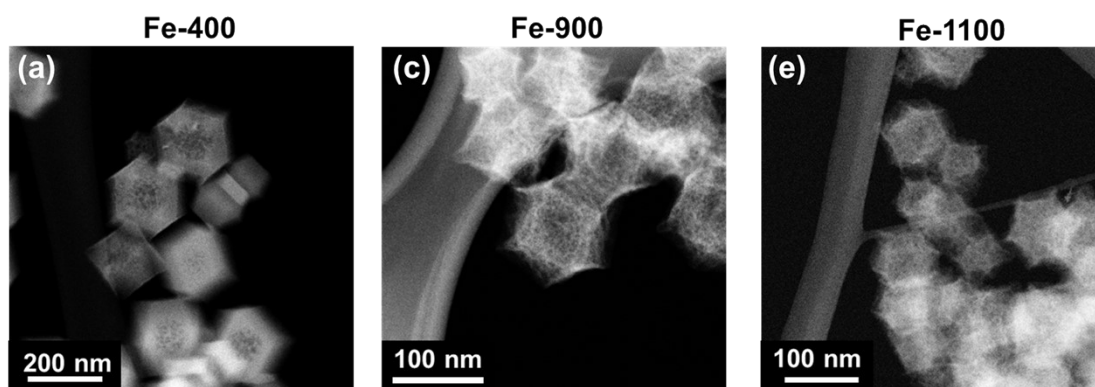

**Figure S2.** HAADF-STEM images of (a) Fe-400, (b) Fe-900, and (c) Fe-1100.

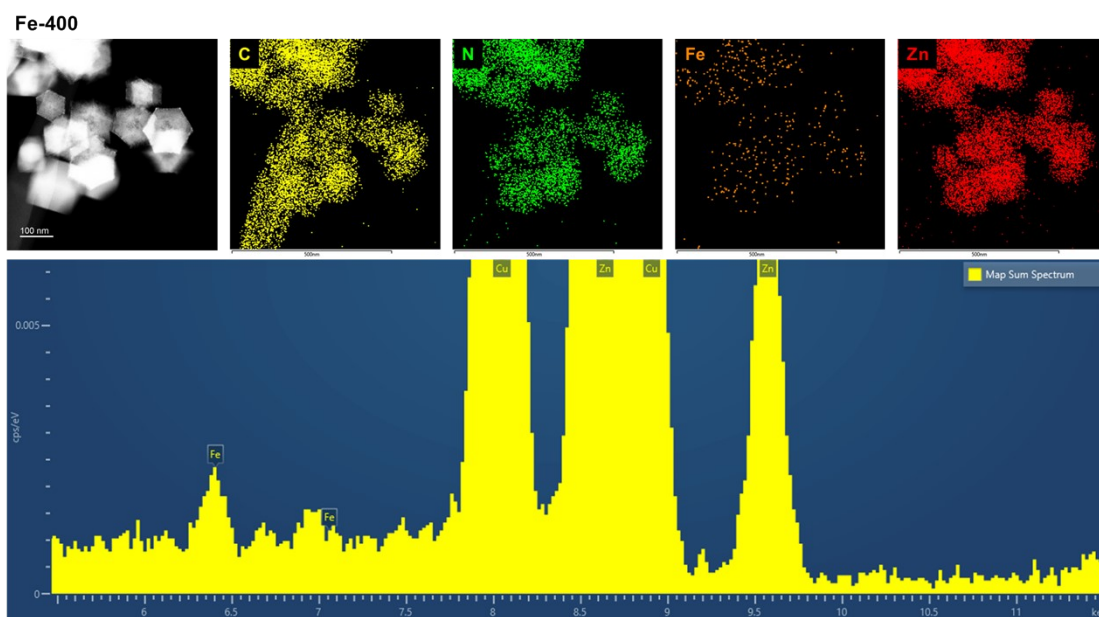

**Figure S3.** EDS elemental mapping and corresponding spectrum of Fe-400.

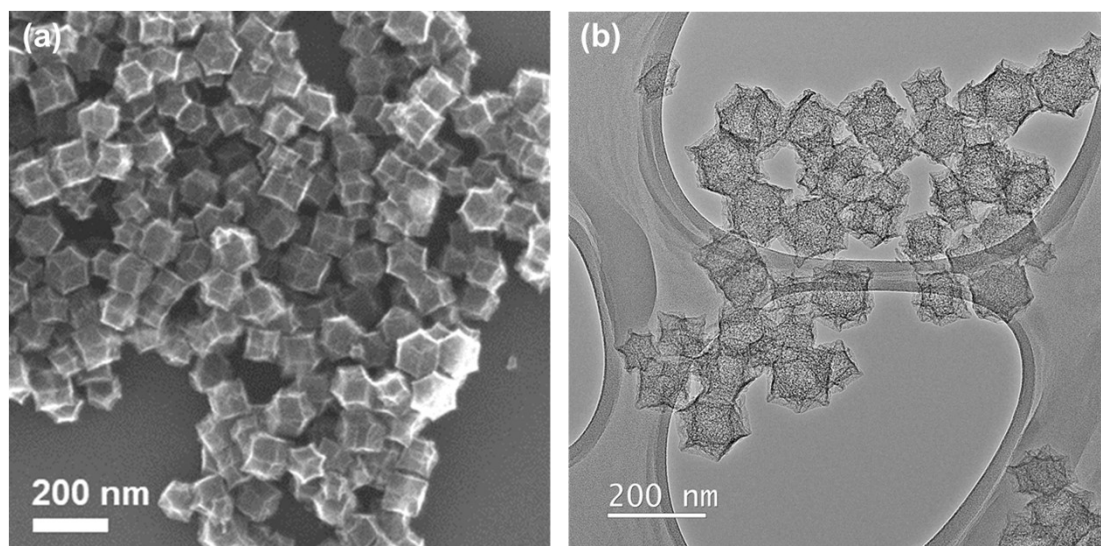

**Figure S4. (a) SEM image, (b) TEM image Fe-900.**

Fe-900

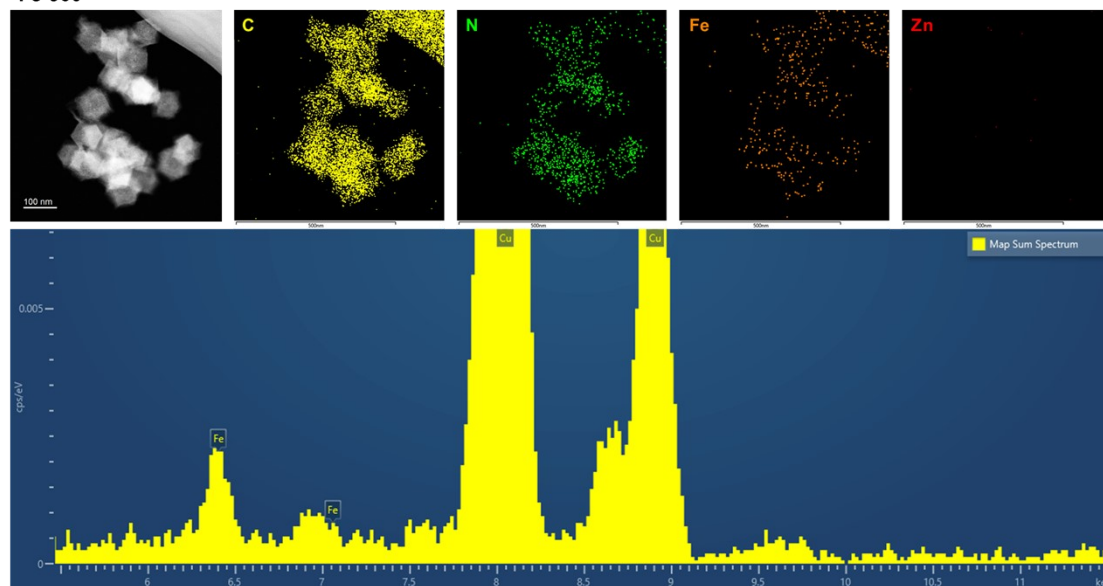

**Figure S5.** EDS elemental mapping and corresponding spectrum of Fe-900.

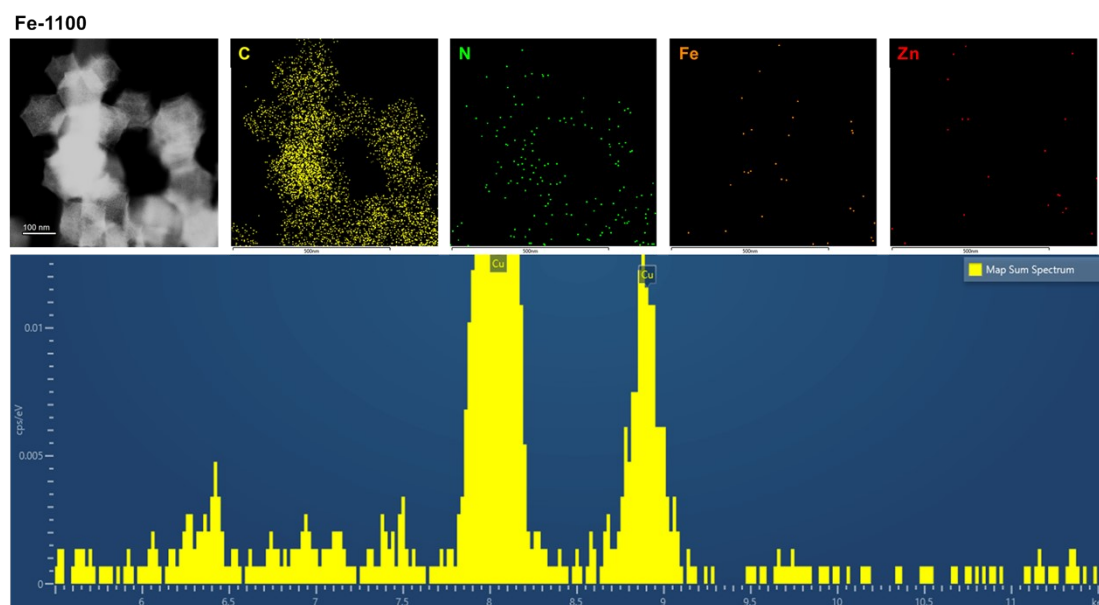

**Figure S6.** EDS elemental mapping and corresponding spectrum of Fe-1100.

**Table S1** Atomic percentages of C, N, Zn, and Fe, as determined by EDS.

|           | <b>Fe-ZIF</b> | <b>Fe-400</b> | <b>Fe-900</b> | <b>Fe-1100</b> |
|-----------|---------------|---------------|---------------|----------------|
| <b>C</b>  | 66.4%         | 73.5%         | 94.2%         | 97.3%          |
| <b>N</b>  | 23.2%         | 21.9%         | 5.7%          | 2.7%           |
| <b>Zn</b> | 10.3%         | 4.5%          | 0.0%          | 0.0%           |
| <b>Fe</b> | 0.1%          | 0.1%          | 0.1%          | 0.0%           |

**Table S2** The ratios of N and C content of the samples from EDS and XPS.

|                | <b>N/C (EDS)</b> | <b>N/C (XPS)</b> |
|----------------|------------------|------------------|
| <b>Fe-ZIF</b>  | 0.349            | 0.399            |
| <b>Fe-400</b>  | 0.298            | 0.387            |
| <b>Fe-900</b>  | 0.061            | 0.043            |
| <b>Fe-1100</b> | 0.028            | 0.014            |

**Table S3** The Fe content of the samples from XPS analysis.

| <b>Fe content (At %)</b> |      |
|--------------------------|------|
| <b>Fe-ZIF</b>            | 0.25 |
| <b>Fe-400</b>            | 0.39 |
| <b>Fe-900</b>            | 3.58 |
| <b>Fe-1100</b>           | 0.02 |

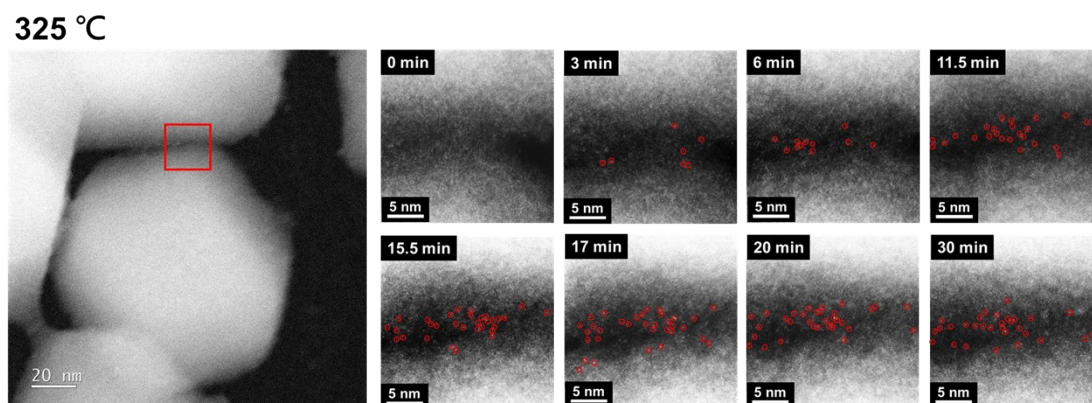

**Figure S7.** Time-sequenced in situ STEM images of the single atom formation during pyrolysis at 325 °C for 30 minutes.

350 °C

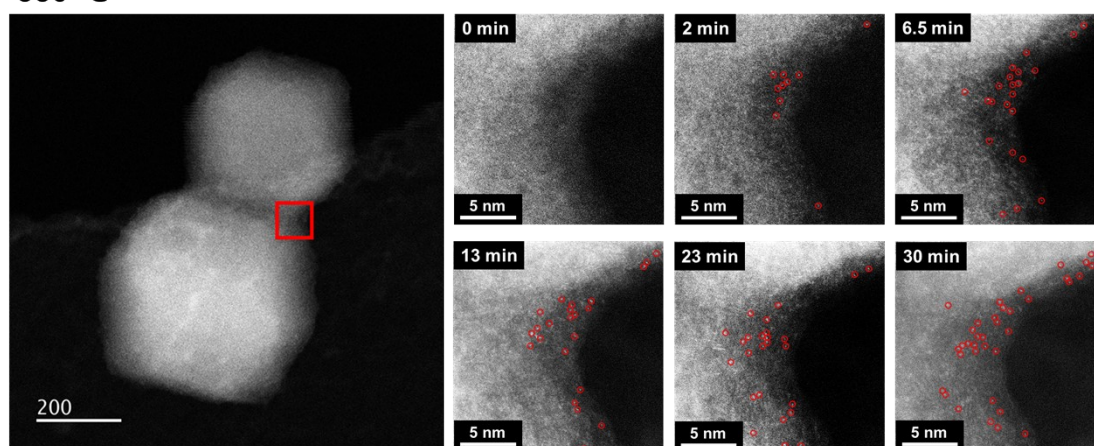

**Figure S8.** Time-sequenced in situ STEM images of the single atom formation during pyrolysis at 350 °C for 30 minutes.

375 °C

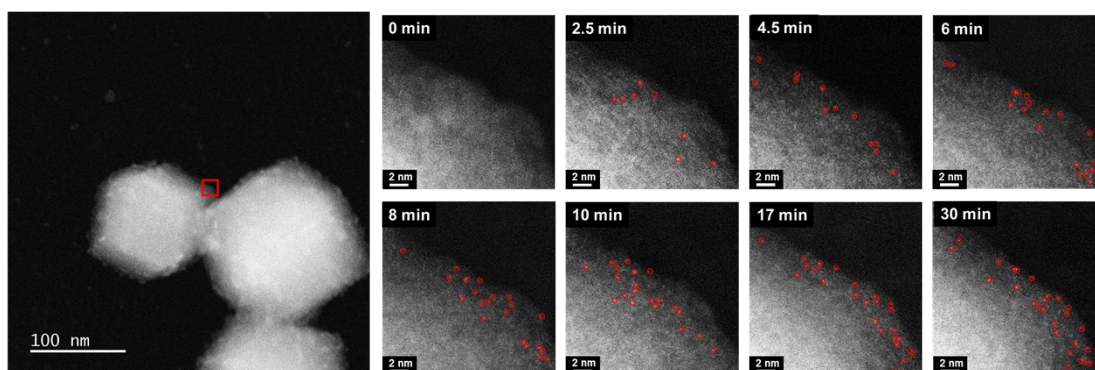

**Figure S9.** Time-sequenced in situ STEM images of the single atom formation during pyrolysis at 375 °C for 30 minutes.

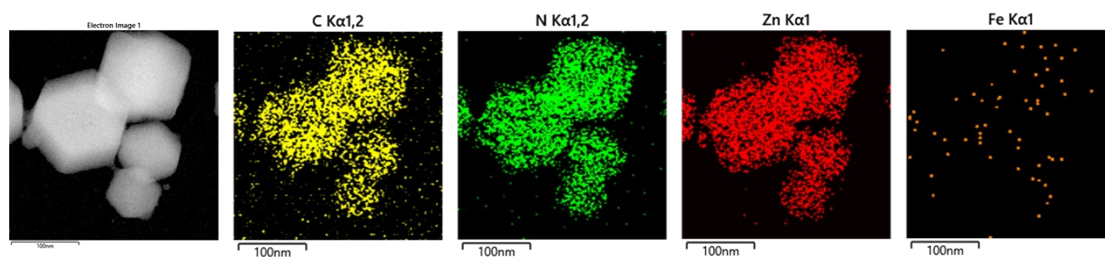

**Figure S10.** EDS elemental mappings of C, N, Zn, and Fe after pyrolysis at 325 °C.

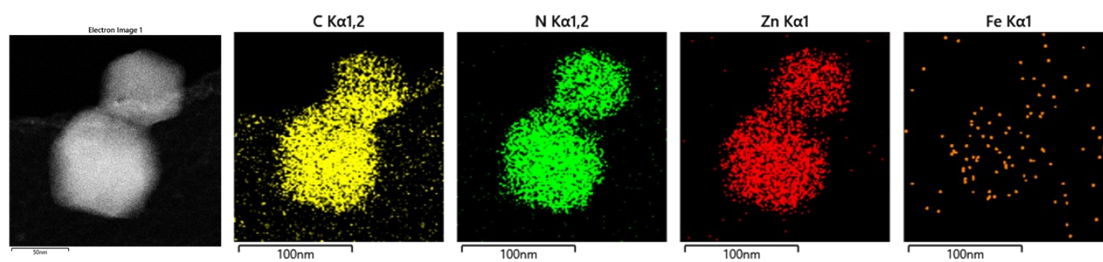

**Figure S11.** EDS elemental mappings of C, N, Zn, and Fe after pyrolysis at 350 °C.

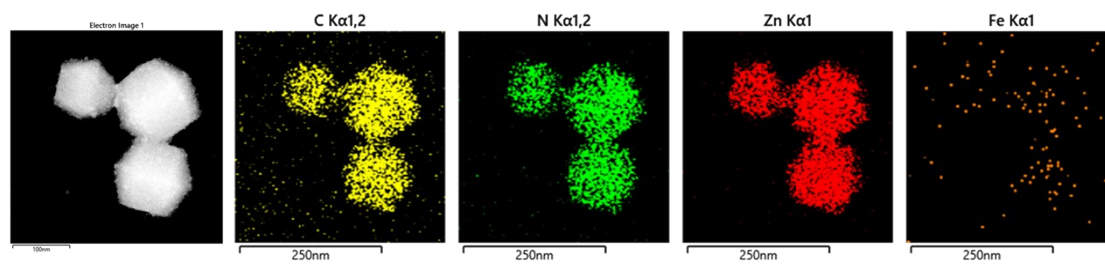

**Figure S12.** EDS elemental mappings of C, N, Zn, and Fe after pyrolysis at 375 °C.

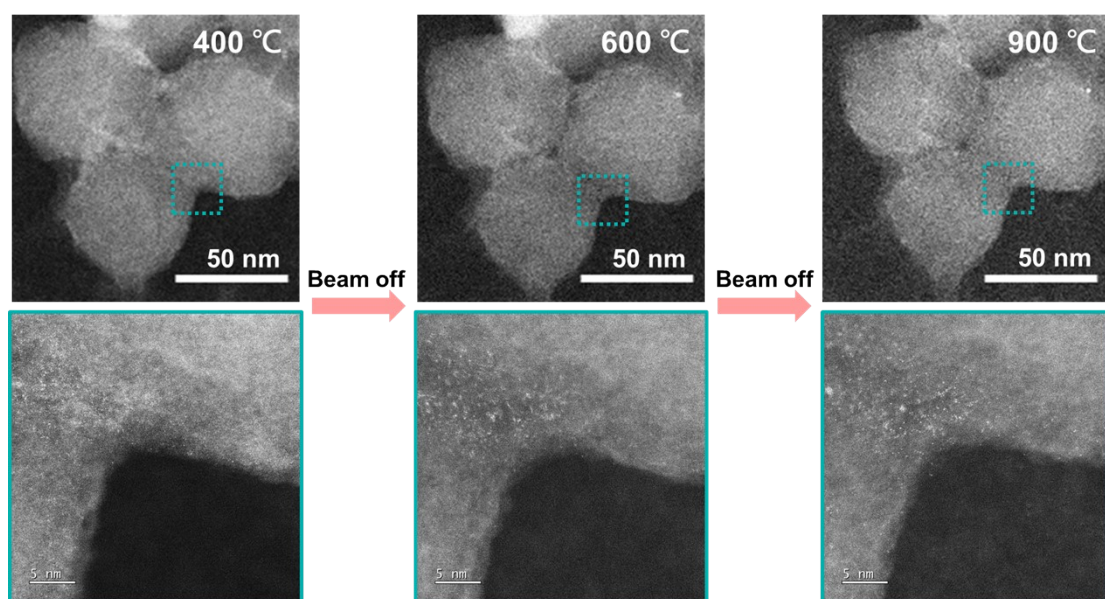

**Figure S13.** In situ STEM images during pyrolysis without beam irradiation effect.

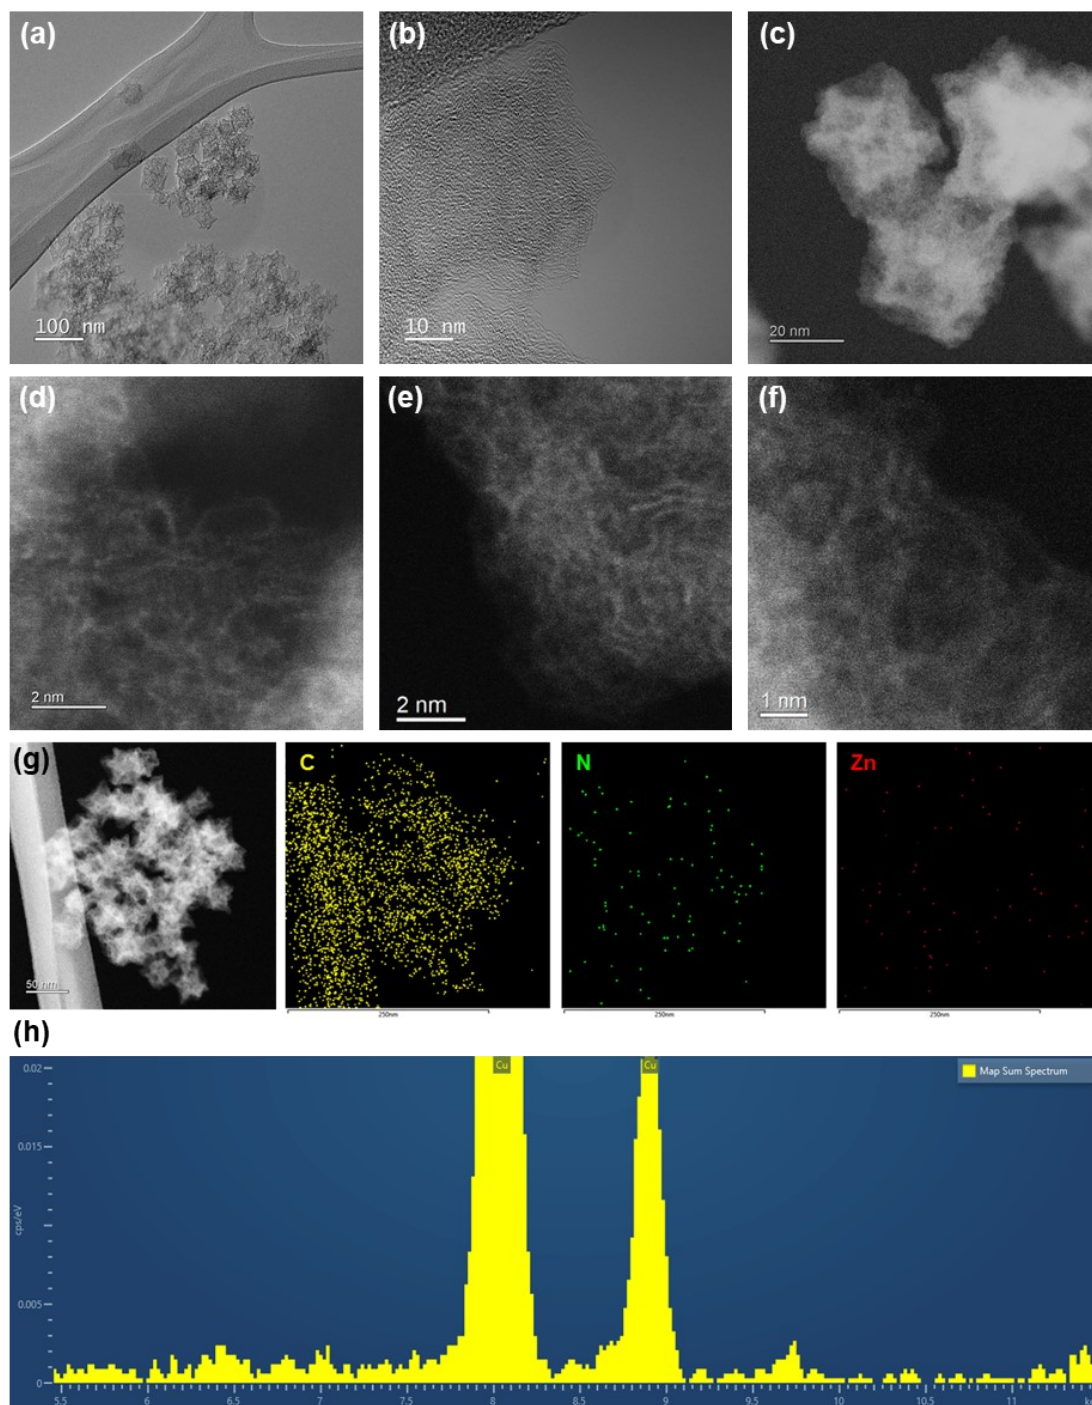

**Figure S14.** (a) TEM image, (b) high-resolution (HR)TEM image, (c) HAADF-STEM image, (d-f) HR HADDF-STEM images, and (e) EDS elemental mappings and (h) the corresponding spectrum of the pristine ZIF-8 derived samples after pyrolysis at 900 °C. The results confirm that Zn species were completely evaporated after pyrolysis at 900 °C and no SA is observed in the carbon matrix.

**Table S4**  $k_1$  and  $k_2$  value at various pyrolysis temperatures.

|               | $k_1$<br>( $\mu\text{m}^{-2}\cdot\text{min}^{-1}$ ) | $k_2$<br>( $\mu\text{m}^{-2}\cdot\text{min}^{-1}$ ) |
|---------------|-----------------------------------------------------|-----------------------------------------------------|
| <b>400 °C</b> | 68027                                               | 7608                                                |
| <b>375 °C</b> | 26263                                               | 3529                                                |
| <b>350 °C</b> | 18247                                               | 1560                                                |
| <b>325 °C</b> | 7177                                                | 815                                                 |

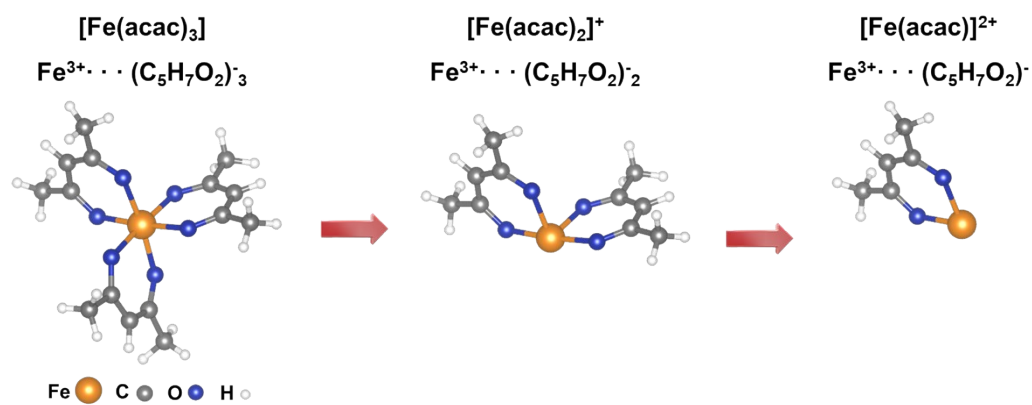

**Figure S15.** Schematic diagram of the decomposition process of  $\text{Fe}(\text{acac})_3$  at elevated temperatures.

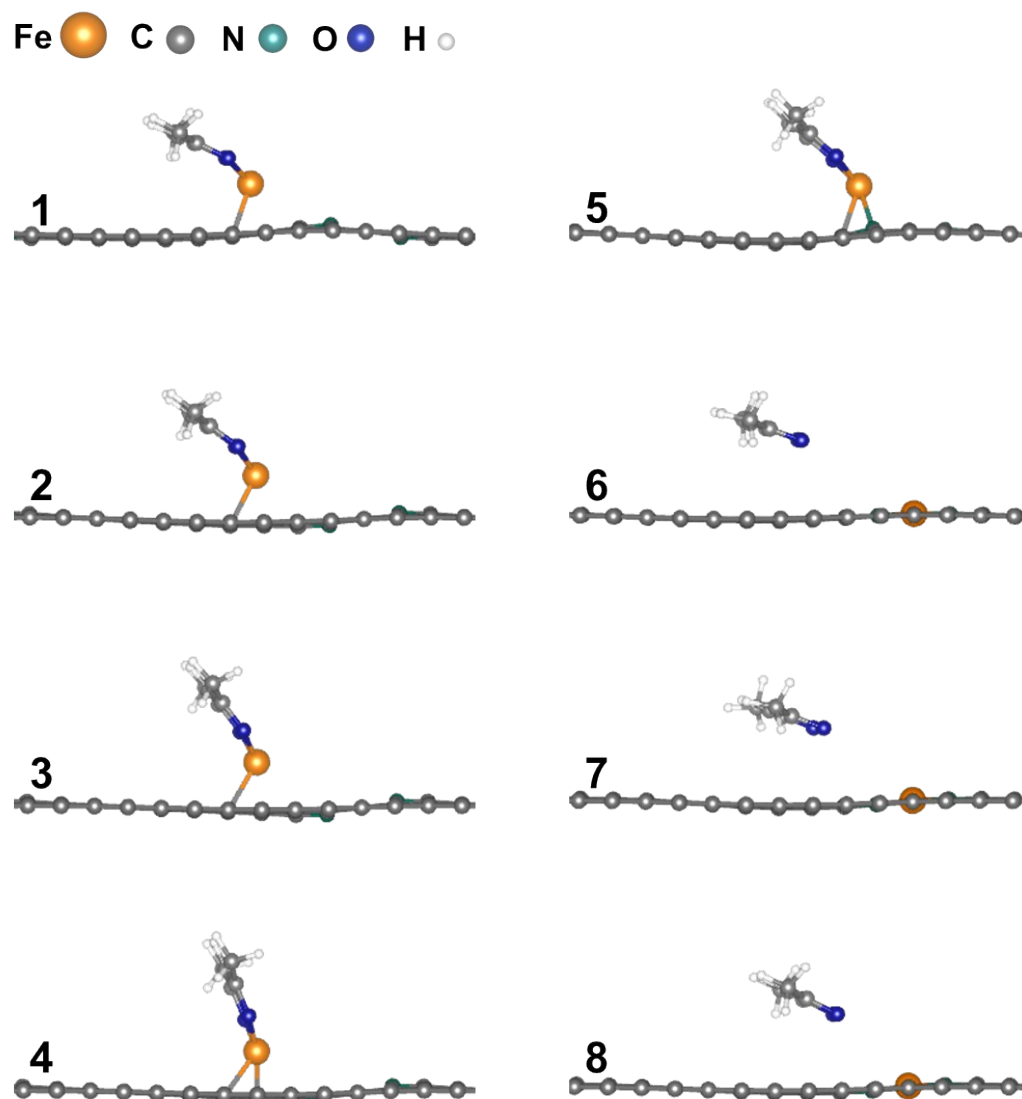

**Figure S16.** Side view of the atomic structure illustrated the atomization pathway for dispersed  $[\text{Fe}(\text{acac})]^{2+}$ .

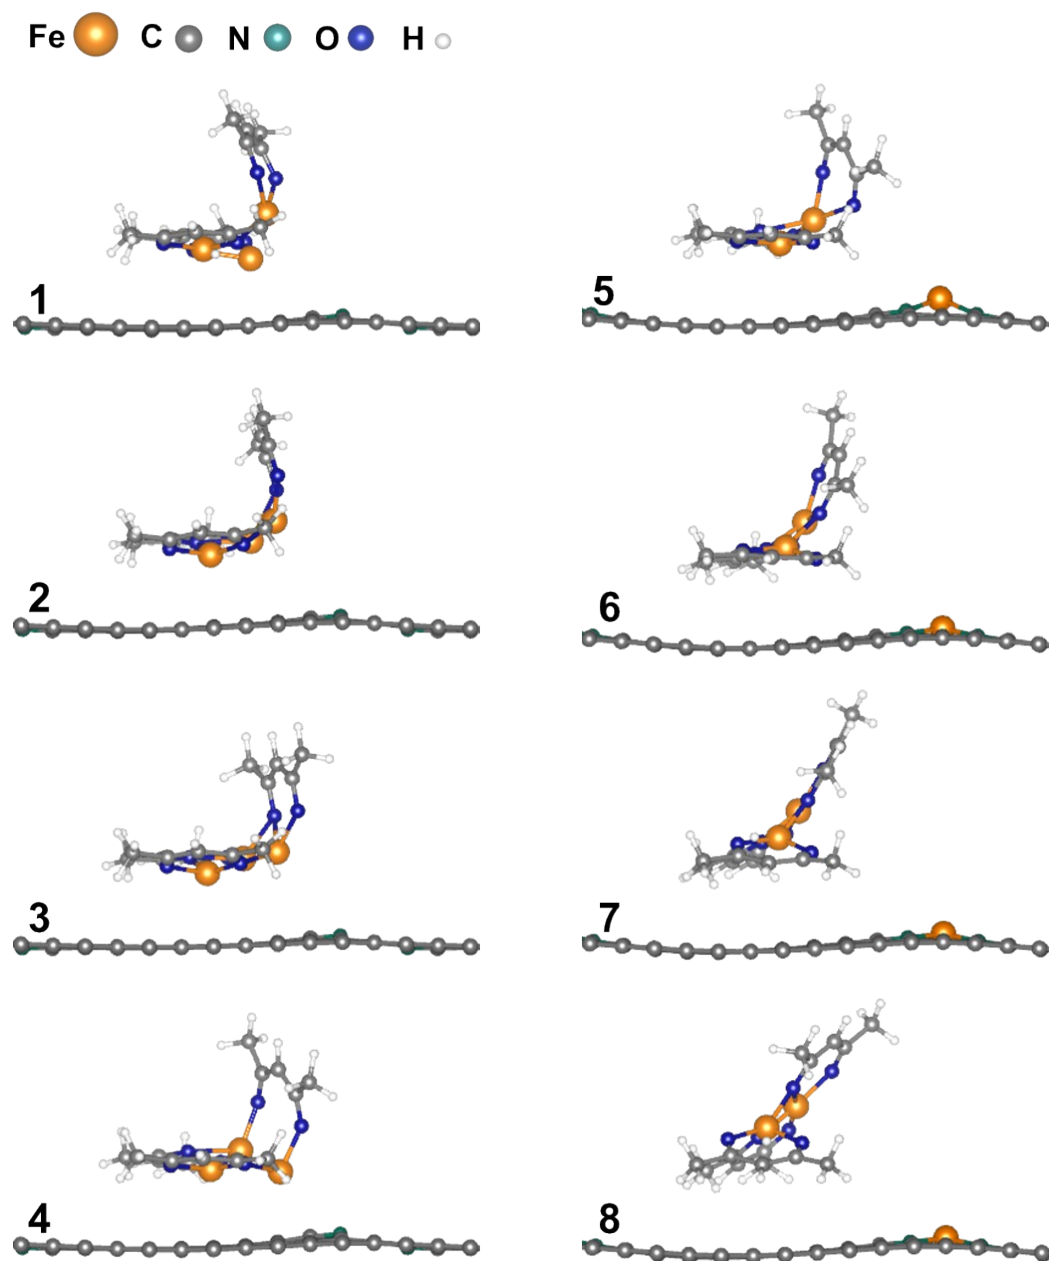

**Figure S17.** Side view of the atomic structure illustrated the atomization pathway for clustered  $[\text{Fe}(\text{acac})]^{2+}$ .

## Reference

1. G. Kresse and J. Furthmüller, *Physical review B*, 1996, **54**, 11169.
2. P. E. Blochl, *Physical Review-Section B-Condensed Matter*, 1994, **50**, 17953-17979.
3. W. Kohn and L. J. Sham, *Phys. Rev.*, 1965, **140**, A1133.
4. P. Hohenberg and W. Kohn, *Phys. Rev*, 1964, **136**, B864.
5. J. P. Perdew, K. Burke and M. Ernzerhof, *Phys. Rev. Lett.*, 1996, **77**, 3865.
6. S. Grimme, J. Antony, S. Ehrlich and H. Krieg, *The Journal of chemical physics*, 2010, **132**.
7. H. J. Monkhorst and J. D. Pack, *Physical review B*, 1976, **13**, 5188.
8. G. Henkelman, B. P. Uberuaga and H. Jónsson, *The Journal of chemical physics*, 2000, **113**, 9901-9904.
